# Supplementary material for: Fluorescent carbon dots from beer for breast cancer cell imaging and drug delivery
Source: Royal Society of Chemistry journal article supplement (doi:10.1039/c5ay01978h), 2015-01-01
Supplement: c5ay01978h1.pdf [file c5ay01978h1.pdf]

**Electronic Supplementary Information**

**Fluorescent carbon dots from beer for breast cancer cell imaging and drug delivery**

Ziyi Wang,<sup>a</sup> Han Liao,<sup>c</sup> Hao Wu,<sup>c</sup> Beibei Wang,<sup>c</sup> Haidong Zhao<sup>a,\*</sup>  
and Mingqian Tan<sup>b,c\*</sup>

*<sup>a</sup>The Second Affiliated Hospital of Dalian Medical University, 467 Zhongshan Road, Dalian 116023, China; [z.hddl@hotmail.com](mailto:z.hddl@hotmail.com)*

*<sup>b</sup>Liaoning Key Laboratory of Food Biological Technology, School of Food Science and Technology, Dalian Polytechnic University, Qinggongyuan I, Ganjingzi District, Dalian 116034, China; [2468750030@qq.com](mailto:2468750030@qq.com); Fax: +86-411-86323262;*

*<sup>c</sup>Division of Biotechnology, Dalian Institute of Chemical Physics, Chinese Academy of Sciences, 457 Zhongshan Road, Dalian 116023, China;*

**Table S1.** Parameters of the lifetime ( $\tau$ ) measurement of BCDs from Tsingtao<sup>®</sup> beer

| $\tau_i$ (ns) | $A_i$ (%) |
|---------------|-----------|
| 0.76          | 25.13     |
| 3.93          | 53.40     |
| 14.85         | 21.47     |

Fluorescence lifetime ( $\tau$ ) of the BCDs was calculated using the equation:  $\tau = (A_1\tau_1^2 + A_2\tau_2^2 + A_3\tau_3^2)/(A_1\tau_1 + A_2\tau_2 + A_3\tau_3)$ . The average fluorescence lifetime of BCDs was 9.02 ns, wherein  $A_i$  is the fractional contributions of time-resolved decay lifetime of  $\tau_i$ ,  $i=1, 2$ , and  $3$ .

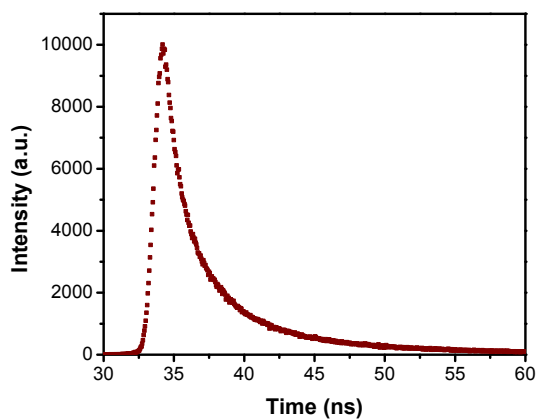

**Fig. S1** Fluorescence decay curve of BCDs with a 376 nm laser as excitation source.

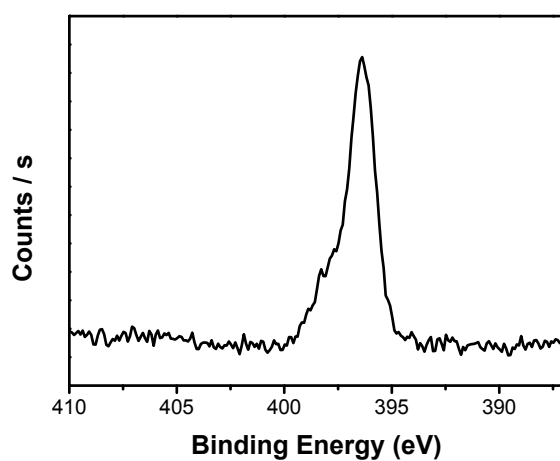

**Fig. S2** N1s spectrum of the BCDs

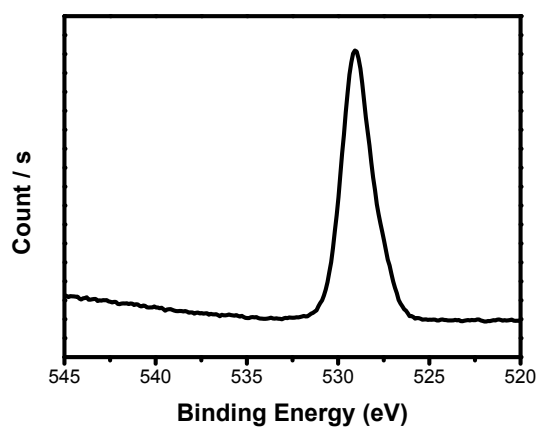

**Fig. S3** O1s spectrum of the BCDs.

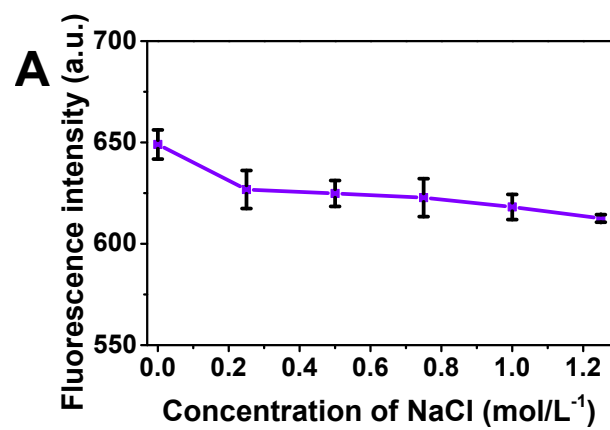

**Fig. S4** Effect of ionic strength on the fluorescence (FL) intensity of BCDs

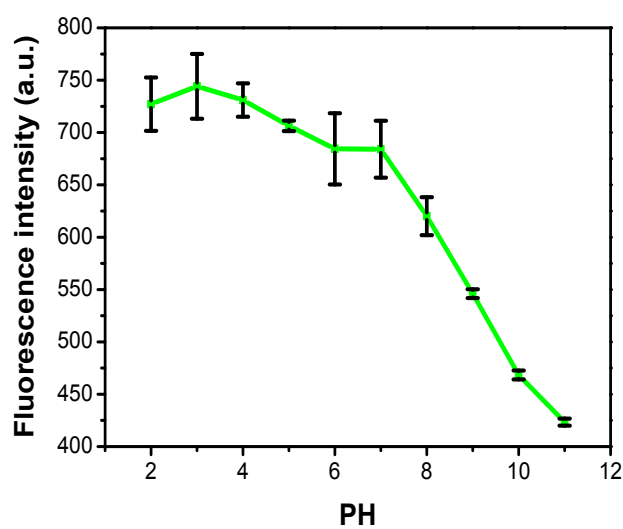

**Fig. S5** pH effect on the fluorescence (FL) intensity of BCDs.

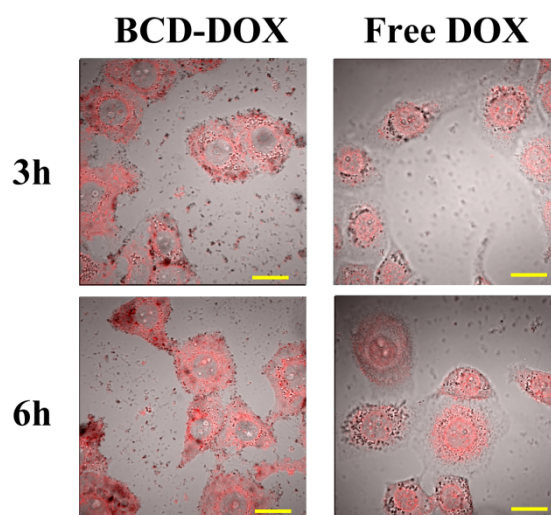

**Fig. S6** Cellular imaging of MCF-7 cells treated with BCD-DOX or free DOX with 543 nm excitation (Merged fluorescence and bright field images). Scale bar=20  $\mu\text{m}$ .
